# Supplementary material
Source: publisher site journal article supplement (https://www.dovepress.com/article/351431)
Supplement: Supplementary file 1 [file get_supplementary_file.php]

**Appendix 1.**

**Study Title:** Embedding physical activity within community home support services for older adults in Ireland – a qualitative study of barriers and enablers

**Interview Guide**

Thank you very much for taking this call. I wanted to talk to you about your experience with Care To Move (CTM), the pros, the cons and where we are now with CTM and the COVID-19 pandemic. Is it ok if I record our call - if YES, Turn on Dictaphone and confirm start. Note start time.

1. Tell me about your experience with the Care to Move training? Could anything be improved to make it easier?
2. How did you find delivering Care to Move with your clients?
3. Did you feel confident delivering Care to Move? And *why?*
4. How was the time taken to deliver Care to Move to your clients?
5. Tell me about your experience filling out the Care to Move paperwork?
6. Could anything be improved to make it easier for HCAs to deliver Care to Move?
7. What did your clients think of the Care to Move program?
8. Did you enjoy delivering Care to Move with your clients? *And why?*
9. Has the COVID-19 pandemic affected your clients? How does their general health/ physical activity levels compare to pre-COVID-19?
10. On a scale of 1-10, with 0 not confident and 10 confident, how are your clients at using technology? Do they currently use any form of technology?
11. How are you at using technology? Have you used Zoom or other video-chat software?
12. In your view, do you think Care to Move should be part of induction training for staff? *Why?*
13. Would you encourage your colleagues who have not done Care to Move training to do it? *Why?*
14. Would it help if there was a supervisor designated to Care to Move within your organization?
15. Are there any aspects of Care to Move that you think we should change to help home care workers or community care clients in the future? *What are they?*
16. Why do you think we are trialling the Care to Move program with home support clients?
17. Did you enjoy being part of this research project? *And why?*
18. Is there anything else you would like to mention about Care to Move/ research study?

Thank you. Turn off Dictaphone and note finish time.
